# Supplementary material for: Depth-selective microscopic observation of a photomobile liquid crystal polymer under UV illumination
Source: Royal Society of Chemistry journal article supplement (doi:10.1039/c4cp04602a), 2014-01-01
Supplement: c4cp04602a1.pdf [file c4cp04602a1.pdf]

Electronic Supplementary Information (ESI)

## **Depth-selective microscopic observation of photomobile liquid crystal polymer under UV illumination**

Kenji Katayama,<sup>\*a</sup> Yougwoon Choi,<sup>c</sup> Jeon Woong Kang,<sup>c</sup> Zahid Yaqoob,<sup>c</sup> Peter T. C. So,<sup>c</sup> Tomomi Fujii,<sup>a</sup>  
Kiyohide Takado,<sup>a,b</sup> Tomiki Ikeda<sup>b</sup>

Monomer (A6AB6)

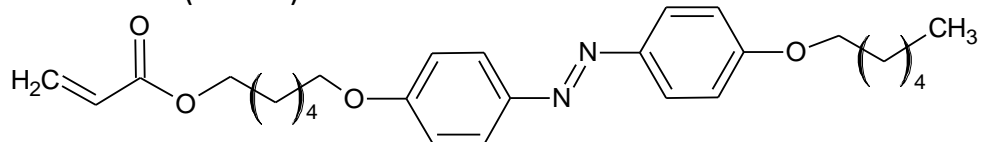

6-[4-(4-Hexyloxyphenylazo)phenoxy]hexylacrylate

Crosslinker (DA6AB)

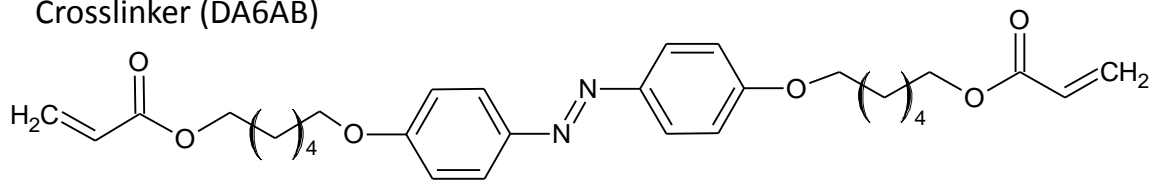

4,4'-Bis[6-(acryloyloxy)hexyloxy]azobenzene

Fig.S1 The molecular structures of the monomer and the crosslinker..

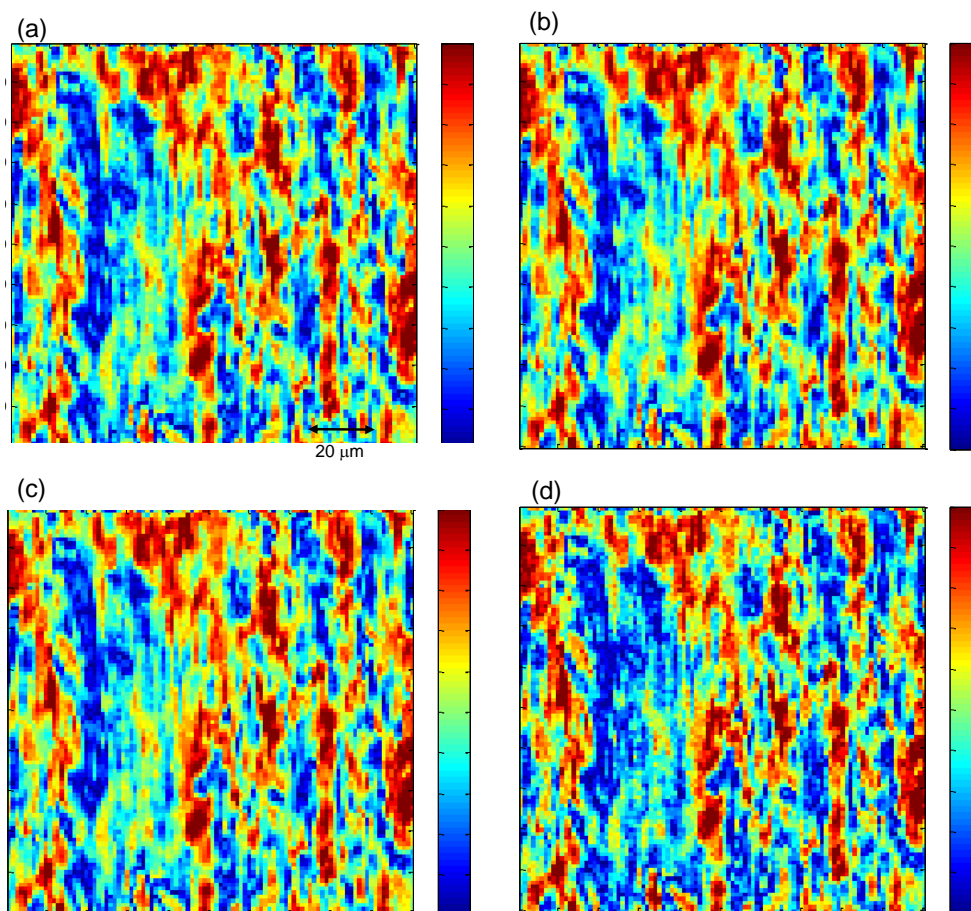

Fig.S2 Anisotropy imaging of a photomobile liquid crystalline polymer film by the Raman microscopy. The anisotropy was calculated using the peaks at 1188, 1409, 1455 and 1602  $\text{cm}^{-1}$ , the corresponding figures are (a), (b), (c) and (d), with a scan step of 1  $\mu\text{m}$  with a field of view of 120x120  $\mu\text{m}^2$ .

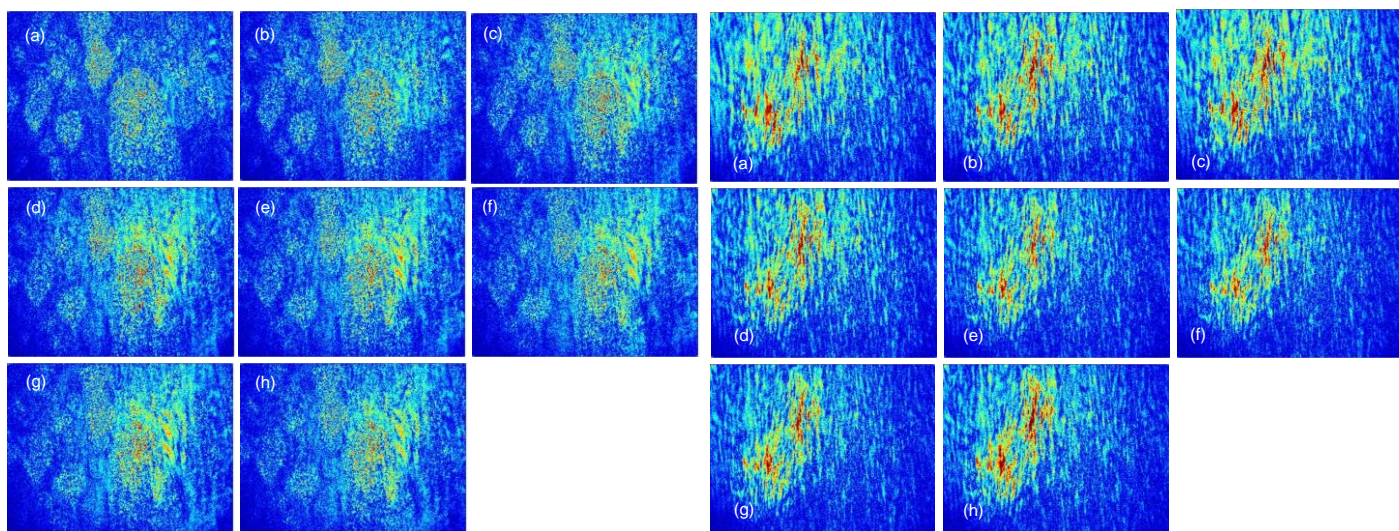

Fig.S3 Sequences of the images of a photomobile liquid crystalline polymer film by irradiation of a UV light when the detection light polarization direction was parallel to the director axis. The left and right sequences correspond to the images at 18.4 and 8.0  $\mu\text{m}$  from the top surface. (a)-(h) corresponds to the images, 0, 15, 30, 45, 60, 90, 120, 180, 240 seconds after the UV irradiation was started, which was stopped after 60 seconds.
