# Supplementary material for: Depth-selective microscopic observation of a photomobile liquid crystal polymer under UV illumination
Source: Royal Society of Chemistry journal article supplement (doi:10.1039/c4cp04602a), 2014-01-01
Supplement: c4cp04602a6.pdf [file c4cp04602a6.pdf]

These are the video file information,

Domain\_parallel(1).wmv

Title: UV induced change at the domain layer (director // polarization of illumination)

Description: SpeCRPM image of a photomobile liquid crystalline polymer film at the domain layer under UV light irradiation for the polarization of illumination parallel to the director axis. The video is played 5x.

Key words: Speckle Correlation Reflection Phase Microscopy, Liquid crystalline polymer film, azobenzene

Domain\_perpendicular(1).wmv

Title: UV induced change at the domain layer (director  $\perp$  polarization of illumination)

Description: SpeCRPM image of a photomobile liquid crystalline polymer film at the domain layer under UV light irradiation for the polarization of illumination perpendicular to the director axis. The video is played 5x.

Key words: Speckle Correlation Reflection Phase Microscopy, Liquid crystalline polymer film, azobenzene

Alignment\_parallel(1).wmv

Title: UV induced change at the alignment layer (director // polarization of illumination)

Description: SpeCRPM image of a photomobile liquid crystalline polymer film at the alignment layer under UV light irradiation for the polarization of illumination parallel to the director axis. The video is played 5x.

Key words: Speckle Correlation Reflection Phase Microscopy, Liquid crystalline polymer film, azobenzene

Alignment\_perpendicular(1).wmv

Title: UV induced change at the alignment layer (director  $\perp$  polarization of illumination)

Description: SpeCRPM image of a photomobile liquid crystalline polymer film at the alignment layer under UV light irradiation for the polarization of illumination perpendicular to the director axis. The video is played 5x.

Key words: Speckle Correlation Reflection Phase Microscopy, Liquid crystalline polymer film, azobenzene
